# Supplementary material
Source: PubMed Central journal article supplement (PMC4640122)
Supplement: supp_mcv043_aob-15124-s01.pdf [file supp_mcv043_aob-15124-s01.pdf]

SUPPLEMENTARY DATA

FIG. S1. Relationship between vapour pressure deficit (VPD) and air temperature ( $T_{\text{air}}$ ) inside the assimilation chamber of a Li-6400 gas-exchange system during measurement of the temperature response curve of photosynthesis. Individual measured values of *Fagus sylvatica* and *Picea abies* grown at ambient (AC) and elevated (EC) atmospheric CO<sub>2</sub> concentrations are shown.

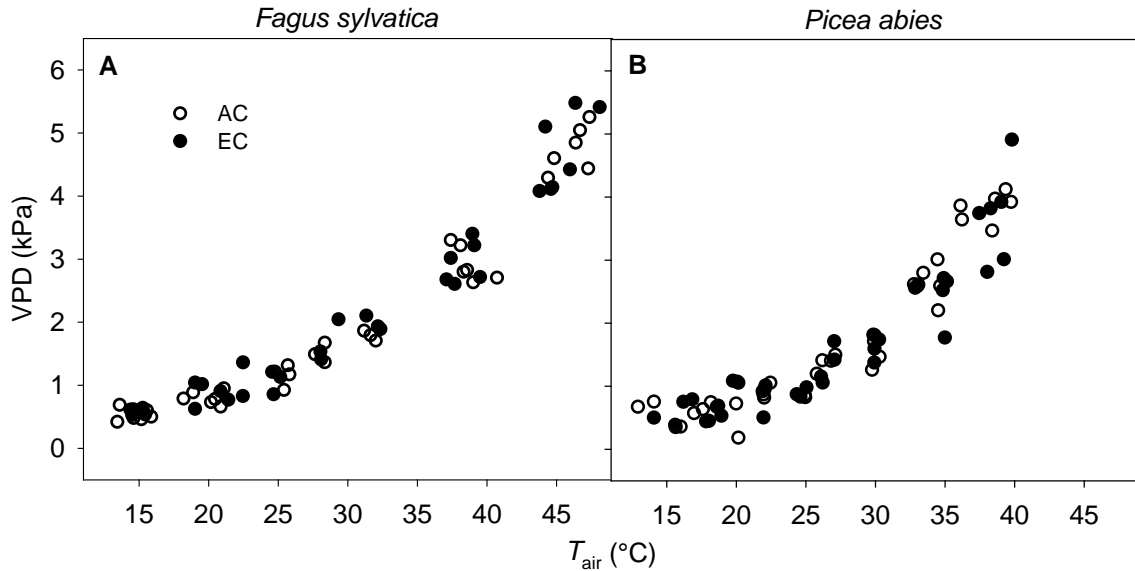

FIG. S2. Temperature response curves of dark mitochondrial respiration ( $R_D$ ) in *Fagus sylvatica* (left) and *Picea abies* (right) grown under ambient (AC) and elevated (EC) atmospheric CO<sub>2</sub> concentrations. Values of  $R_D$  were measured after 15 min of dark adaptation at a given temperature using a Li-6400 open infra-red gas analyser (Li-Cor, USA). Exponential Arrhenius functions were fitted to the  $R_D$  data:  $R_D(T) = R_D(20) \cdot Q_{10} \exp((T-20)/10)$ , where  $R_D(T)$  represents the rate of respiration ( $\mu\text{mol m}^{-2} \text{s}^{-1}$ ) at the given leaf temperature  $T$  ( $^{\circ}\text{C}$ ),  $R_D(20)$  is the rate at reference temperature 20 $^{\circ}\text{C}$  and  $Q_{10}$  is the factor by which the rate constant increases for a 10 $^{\circ}\text{C}$  temperature increment.  $R^2$  ranged from 0.92 to 0.94 ( $p < 0.01$ ). Differences in the  $R_D(20)$  and  $Q_{10}$  parameters between species and CO<sub>2</sub> treatments were not statistically significant ( $p > 0.05$ ) and ranged between 0.71 and 0.93 ( $R_D(20)$ ) and 2.03 and 2.20 ( $Q_{10}$ ).

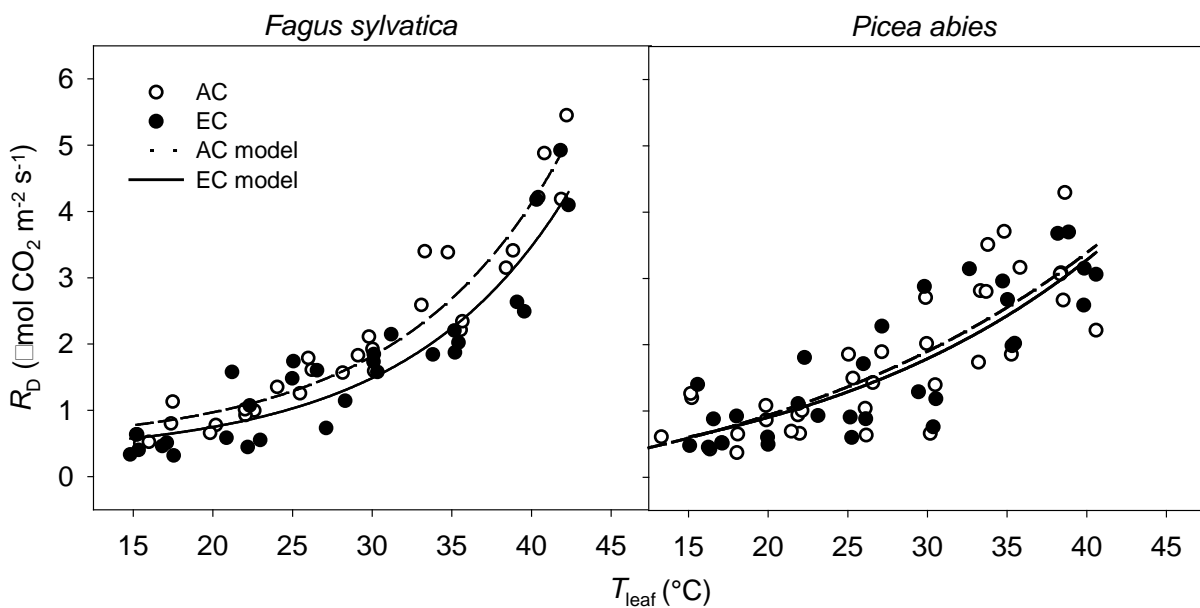

TABLE S1. Comparison of daily air temperature ( $T_{\text{air}}$ ) and relative humidity (RH) statistics between glass domes with ambient (AC) and elevated (EC) CO<sub>2</sub> concentrations for the 7 days preceding individual measurement periods. Mean, minimum and maximum values of selected characteristics are presented for the periods 6–12 July 2010, 13–19 July 2010 and 15–21 August 2011, corresponding to periods prior to measurement campaigns for *Fagus sylvatica*, *Picea abies*, and both species, respectively (see Material and methods). Sums of precipitation for these periods were 38.8, 13.4, and 42.8 mm, respectively.

|                   | $T_{\text{air}}$ AC [°C] |                     | $T_{\text{air}}$ EC [°C] |                     | RH AC [%] |                     | RH EC [%] |                      |
|-------------------|--------------------------|---------------------|--------------------------|---------------------|-----------|---------------------|-----------|----------------------|
| 6–12 July 2010    | 20.4                     | $\frac{7.9}{31.2}$  | 20.9                     | $\frac{8.4}{32.4}$  | 63.0      | $\frac{28.6}{99.8}$ | 63.3      | $\frac{28.8}{100.0}$ |
| 13–19 July 2010   | 22.8                     | $\frac{11.9}{35.1}$ | 23.2                     | $\frac{12.3}{34.9}$ | 69.5      | $\frac{33.3}{99.7}$ | 69.8      | $\frac{33.5}{100.0}$ |
| 15–21 August 2011 | 19.4                     | $\frac{11.3}{26.7}$ | 20.1                     | $\frac{11.1}{27.7}$ | 72.9      | $\frac{38.1}{98.7}$ | 69.1      | $\frac{31.2}{98.7}$  |

TABLE S2. Parameters (mean values  $\pm$  standard deviations) of temperature response curves of light-saturated rate of Rubisco carboxylation ( $V_{\text{Cmax}}$ ) and light-saturated rate of photorespiration ( $R_{\text{L}}$ ) calculated for individual leaves of *Fagus sylvatica* and *Picea abies* grown at ambient (AC) and elevated (EC) CO<sub>2</sub> concentrations. The modified Arrhenius function (Equation 2) was fitted to the  $V_{\text{Cmax}}$  and  $R_{\text{L}}$  data.  $V_{\text{Cmax},25}$  and  $R_{\text{L},25}$  are  $V_{\text{Cmax}}$  and  $R_{\text{L}}$  rates at reference leaf temperature 25 °C;  $T_{\text{opt}}(V_{\text{Cmax}})$  and  $T_{\text{opt}}(R_{\text{L}})$  are temperature optima of  $V_{\text{Cmax}}$  and  $R_{\text{L}}$ ;  $\Delta H_{\text{a}}$  is the activation energy;  $\Delta H_{\text{d}}$  is the deactivation energy of the given parameter;  $\Delta S$  is the entropy. \* and \*\* indicate statistically significant difference between AC and EC treatments at  $p < 0.05$  and  $0.01$ , respectively.

|                                   |                                      | <i>F. sylvatica</i> |                     | <i>P. abies</i> |                     |
|-----------------------------------|--------------------------------------|---------------------|---------------------|-----------------|---------------------|
|                                   |                                      | AC                  | EC                  | AC              | EC                  |
| $V_{\text{Cmax},25}$              | $\mu\text{mol m}^{-2} \text{s}^{-1}$ | $39.3 \pm 5.8$      | $34.4 \pm 4.3$      | $26.5 \pm 2.2$  | $23.1 \pm 4.2$      |
| $\Delta H_{\text{a}}$             | $\text{kJ mol}^{-1}$                 | $67.0 \pm 10.5$     | $63.7 \pm 5.7$      | $80.6 \pm 40.0$ | $70.1 \pm 29.7$     |
| $\Delta H_{\text{d}}$             | $\text{kJ mol}^{-1}$                 | $337 \pm 85$        | $734 \pm 297^*$     | $308 \pm 160$   | $483 \pm 403$       |
| $\Delta S$                        | $\text{kJ mol}^{-1}$                 | $1.08 \pm 0.27$     | $2.32 \pm 0.93^*$   | $1.00 \pm 0.51$ | $1.55 \pm 1.28$     |
| $T_{\text{opt}}(V_{\text{Cmax}})$ | °C                                   | $36.4 \pm 1.6$      | $40.0 \pm 1.1^{**}$ | $32.4 \pm 1.2$  | $35.7 \pm 1.1^{**}$ |
| $R_{\text{L},25}$                 | $\mu\text{mol m}^{-2} \text{s}^{-1}$ | $6.2 \pm 0.1$       | $3.2 \pm 0.1^{**}$  | $3.2 \pm 0.1$   | $0.5 \pm 0.4^{**}$  |
| $\Delta H_{\text{a}}$             | $\text{kJ mol}^{-1}$                 | 44.8                | 105.8               | 191.3           | 916.0               |
| $\Delta H_{\text{d}}$             | $\text{kJ mol}^{-1}$                 | 186.4               | 190.1               | 255.3           | 982.6               |
| $\Delta S$                        | $\text{kJ mol}^{-1}$                 | 0.61                | 0.62                | 0.86            | 3.25                |
| $T_{\text{opt}}(R_{\text{L}})$    | °C                                   | $30.0 \pm 0.2$      | $35.3 \pm 0.1^{**}$ | $25.8 \pm 0.5$  | $34.2 \pm 3.3^{**}$ |
